# Supplementary material for: Active Expression of Genes for Protein Modification Enzymes in Habu Venom Glands
Source: MDPI journal article supplement (doi:10.3390/toxins14050300), 2022-04-22
Supplement: s1 [file s1]

# Supplementary Materials: Active Expression of Genes for Protein Modification Enzymes in Habu Venom Glands

Akiko Isomoto, Eiichi Shoguchi, Kanako Hisata, Jun Inoue, Yinrui Sun, Kenji Inaba, Noriyuki Satoh, Tomohisa Ogawa and Hiroki Shibata

**Table S1.** Genes highly expressed in venom glands from the first adult habu (venom gland-specimen#1: a sub-adult specimen).

| Gene Model ID           | Gene name                           | Annotation by Blast2GO                                                                       | TPM       |                                                         |
|-------------------------|-------------------------------------|----------------------------------------------------------------------------------------------|-----------|---------------------------------------------------------|
| habu1_s258676_g24318.t1 | <i>CNP01</i>                        | bradykinin-potentiating and C-type natriuretic peptides                                      | 260,950.0 | Venom protein                                           |
| habu1_s14911_g21429.t1  | <i>svMP06</i>                       | svMP06, H2, metalloproteinase (metalloprotease P-Iia)                                        | 83,772.3  | Venom protein                                           |
| habu1_s47459_g23397.t1  | <i>svPLA2-02, svPLA2-03</i>         | svPLA2-02, PL-Y/PL-X'/PL-B, svPLA2-03, PLA-N                                                 | 24,153.9  | Venom protein                                           |
| habu1_s14911_g21430.t1  | <i>svMP07</i>                       | svMP07, HR2a, svMP08, flavoridin                                                             | 19,406.5  | Venom protein                                           |
| habu1_s565_g02677.t1    |                                     | creatine kinase m-type                                                                       | 13,375.4  |                                                         |
| habu1_s3443_g11710.t1   | <i>P4HB</i>                         | protein disulfide-isomerase                                                                  | 13,303.9  | Modification enzyme for proteins analyzed in this study |
| habu1_s10061_g19809.t1  | <i>svCTLP06</i>                     | svCTLP06, flavocetin-A beta                                                                  | 13,143.3  | Venom protein                                           |
| habu1_s9571_g19434.t1   | <i>svPLA2-01</i>                    | svPLA2-01, Asp49PLA2/PL1a/PL2a                                                               | 9,325.0   | Venom protein                                           |
| habu1_s9571_g19433.t1   | <i>svPLA2-08</i>                    | svPLA2-08, PfPLA6                                                                            | 8,532.3   | Venom protein                                           |
| habu1_s2592_g09356.t1   |                                     | parvalbumin beta-like                                                                        | 8,060.9   |                                                         |
| habu1_s1877_g06936.t1   |                                     | myosin light chain                                                                           | 7,569.0   |                                                         |
| habu1_s4277_g13818.t1   |                                     | alpha skeletal muscle                                                                        | 7,092.6   |                                                         |
| habu1_s301_g01413.t1    |                                     | PREDICTED: troponin T, fast skeletal muscle isoforms-like isoform X7, X5 [Python bivittatus] | 6,268.5   |                                                         |
| habu1_s10061_g19810.t1  | <i>svCTLP03, svCTLP04, svCTLP07</i> | svCTLP07 rhodocetinEMS16-like-beta                                                           | 6,259.5   | Venom protein                                           |
| habu1_s867_g03056.t1    |                                     | calglandulin-like protein                                                                    | 6,243.7   |                                                         |
| habu1_s158_g00895.t1    |                                     | forkhead box protein j1                                                                      | 5,899.5   |                                                         |
| habu1_s9570_g19432.t1   | <i>svPLA2-07</i>                    | svPLA2-07 PL1b/PL2b                                                                          | 5,853.2   | Venom protein                                           |
| habu1_s5309_g15576.t1   |                                     | PREDICTED: 40S ribosomal protein, S25                                                        | 5,337.2   | Ribosomal protein                                       |
| habu1_s2087_g07635.t1   |                                     | ribosomal protein                                                                            | 5,084.4   | Ribosomal protein                                       |
| habu1_s4158_g13542.t1   |                                     | 55 kda erythrocyte membrane protein,                                                         | 5,003.6   |                                                         |
| habu1_s1917_g07050.t1   |                                     | 60s ribosomal protein l7a                                                                    | 4,207.0   | Ribosomal protein                                       |

|                         |          |                                                         |         |                   |
|-------------------------|----------|---------------------------------------------------------|---------|-------------------|
| habu1_s9530_g19385.t1   |          | PREDICTED: elongation factor 1-beta                     | 4,185.3 |                   |
| habu1_s2955_g10552.t1   |          | elongation factor 1-alpha 1                             | 4,094.6 |                   |
| habu1_s1466_g05403.t1   |          | peptidyl-prolyl cis-trans isomerase a-like              | 4,091.7 |                   |
| habu1_s16120_g21649.t1  |          | 60s ribosomal protein l18a                              | 4,042.8 | Ribosomal protein |
| habu1_s68614_g23647.t1  |          | 60s ribosomal protein l7                                | 4,037.2 | Ribosomal protein |
| habu1_s7991_g18513.t1   |          | 40s ribosomal protein partial                           | 3,958.8 | Ribosomal protein |
| habu1_s7978_g18472.t1   |          | 60s acidic ribosomal protein p2                         | 3,796.5 | Ribosomal protein |
| habu1_s2370_g08604.t1   |          | calsquestrin-partial                                    | 3,732.7 |                   |
| habu1_s6274_g17028.t1   |          | ubiquitin-40s ribosomal protein s27a                    | 3,642.4 |                   |
| habu1_s3168_g10977.t1   | svCTLP08 | svCTLP08, C-lectin02                                    | 3,625.6 | Venom protein     |
| habu1_s3258_g11210.t1   | svMP04   | svMP04, jerdonitin-like                                 | 3,623.7 | Venom protein     |
| habu1_s3258_g11211.t1   | svMP05   | svMP05, HR1a                                            | 3,603.2 | Venom protein     |
| habu1_s7284_g17906.t1   |          | 40s ribosomal protein s13                               | 3,532.7 | Ribosomal protein |
| habu1_s37466_g23178.t1  |          | growth-related translationally controlled tumor protein | 3,513.5 |                   |
| habu1_s74_g00428.t1     |          | 60s ribosomal protein l11                               | 3,486.1 | Ribosomal protein |
| habu1_s2449_g08987.t1   |          | 60s ribosomal protein l31                               | 3,393.7 | Ribosomal protein |
| habu1_s3765_g12603.t1   |          | 40s ribosomal protein s3a                               | 3,384.6 | Ribosomal protein |
| habu1_s86658_g23820.t1  |          | 60s acidic ribosomal protein p1                         | 3,142.2 | Ribosomal protein |
| habu1_s402938_g24930.t1 |          | 60s ribosomal protein l36                               | 2,914.9 | Ribosomal protein |
| habu1_s2592_g09366.t1   |          | cytoplasmic 2                                           | 2,911.7 |                   |
| habu1_s1924_g07069.t1   |          | 40s ribosomal protein s15a                              | 2,909.6 | Ribosomal protein |
| habu1_s2444_g08904.t1   |          | 60s ribosomal protein l30                               | 2,907.9 | Ribosomal protein |
| habu1_s1408_g05043.t1   |          | 60s ribosomal protein l5                                | 2,888.9 | Ribosomal protein |
| habu1_s1529_g05741.t1   |          | 40s ribosomal protein s10                               | 2,740.9 | Ribosomal protein |
| habu1_s188_g01057.t1    |          | 60s ribosomal protein partial                           | 2,630.9 | Ribosomal protein |
| habu1_s4331_g13956.t1   |          | 40s ribosomal protein s8                                | 2,598.8 | Ribosomal protein |
| habu1_s3872_g12862.t1   |          | 40s ribosomal protein s20                               | 2,572.6 | Ribosomal protein |
| habu1_s231_g01271.t1    |          | 60s ribosomal protein l24                               | 2,569.3 | Ribosomal protein |
| habu1_s336341_g24425.t1 |          | claudin- partial                                        | 2,558.1 |                   |

Transcripts are expressed as "Transcripts per million" (TPM). red: Venom protein genes, blue: Protein modification genes analyzed in this study.

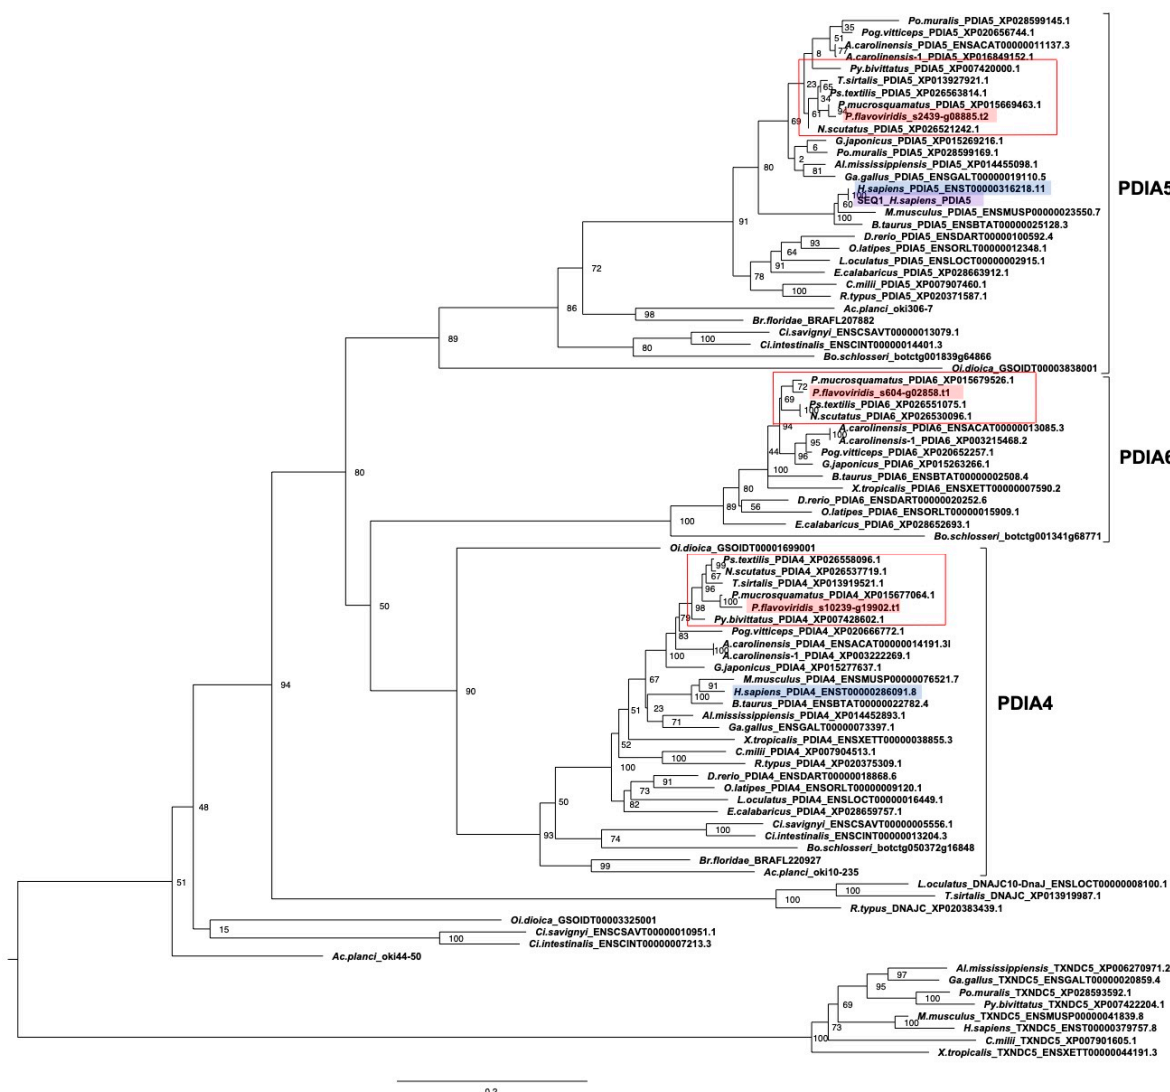

**Figure S1.** Molecular phylogenetic tree estimated using ORTHOSCOPE with human *PDIA5* as the query sequence (highlighted in purple).

Sequences highlighted in blue indicate human orthologs. Those highlighted in pink represent habu (*P. flavoviridis*) orthologs, and those in red boxes represent other snake species. Values beside branches represent percentages of times that a node was supported in 100 bootstrap pseudoreplications implemented in ORTHOSCOPE. The scale bar indicates an evolutionary distance of 0.2 substitutions per position.

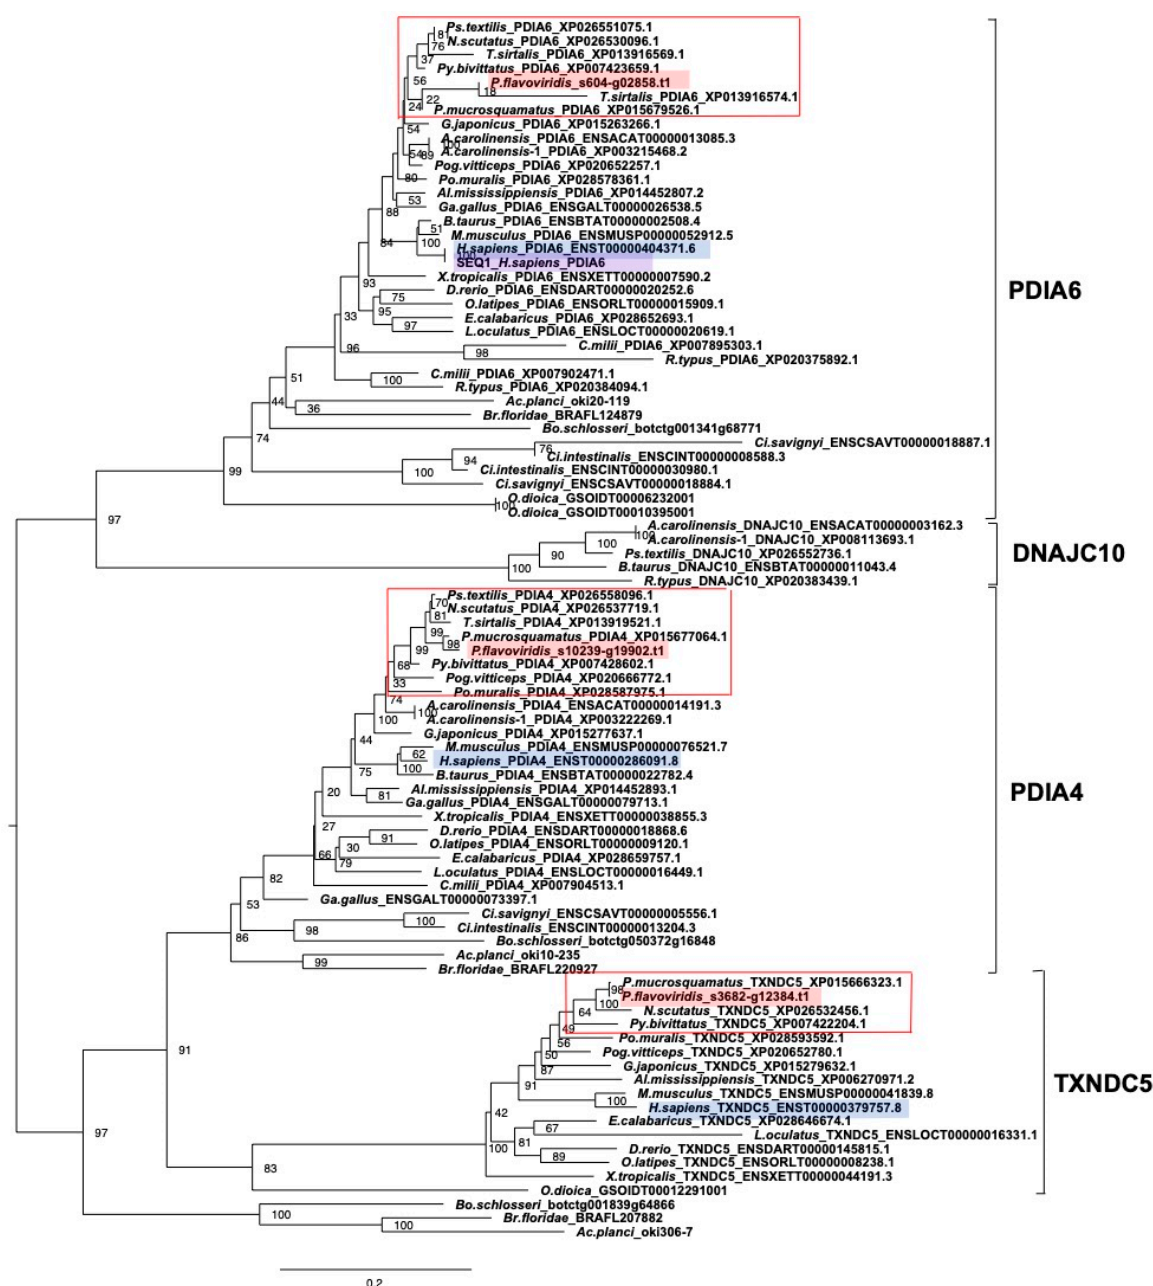

**Figure S2.** Molecular phylogenetic tree estimated using ORTHOSCOPE with human *PDIA6* as the query sequence (highlighted in purple).

Sequences highlighted in blue indicate human orthologs. Those highlighted in pink represent habu (*P. flavoviridis*) orthologs, and those in red boxes represent other snake species. Values beside branches represent percentages of times that a node was supported in 100 bootstrap pseudoreplications implemented in ORTHOSCOPE. The scale bar indicates an evolutionary distance of 0.2 substitutions per position.

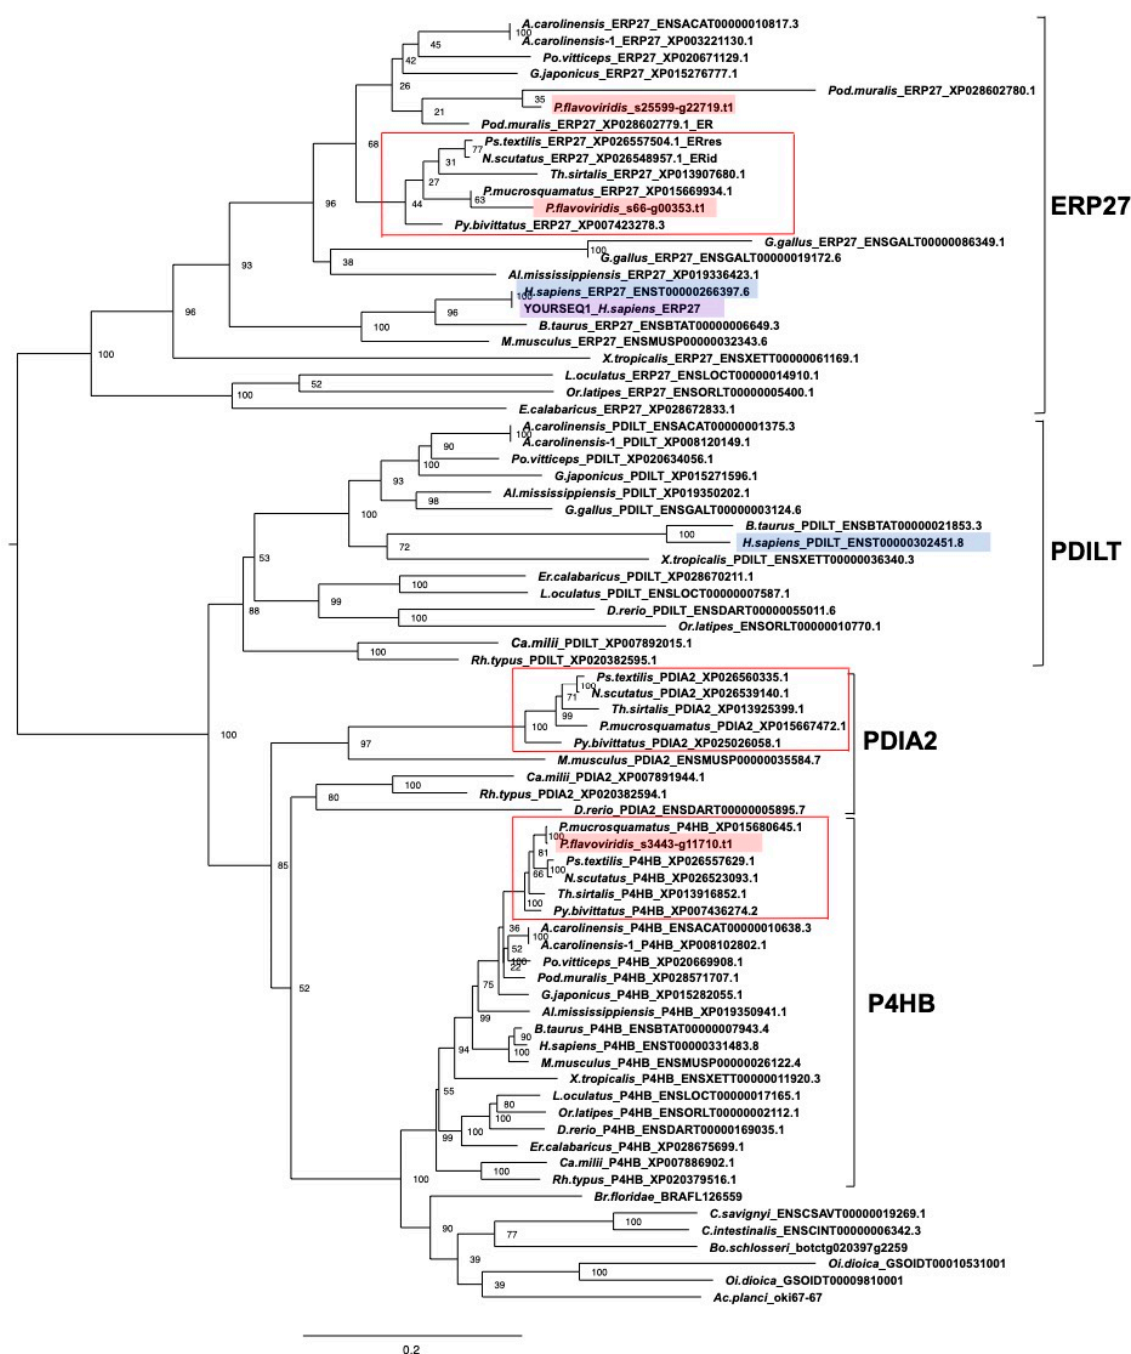

**Figure S3.** Molecular phylogenetic tree estimated using ORTHOSCOPE with human *ERP27* as the query sequence (highlighted in purple).

Sequences highlighted in blue indicate human orthologs. Those highlighted in pink represent habu (*P. flavoviridis*) orthologs, and those in red boxes represent other snake species. Values beside branches represent percentages of times that a node was supported in 100 bootstrap pseudoreplications implemented in ORTHOSCOPE. The scale bar indicates an evolutionary distance of 0.2 substitutions per position.

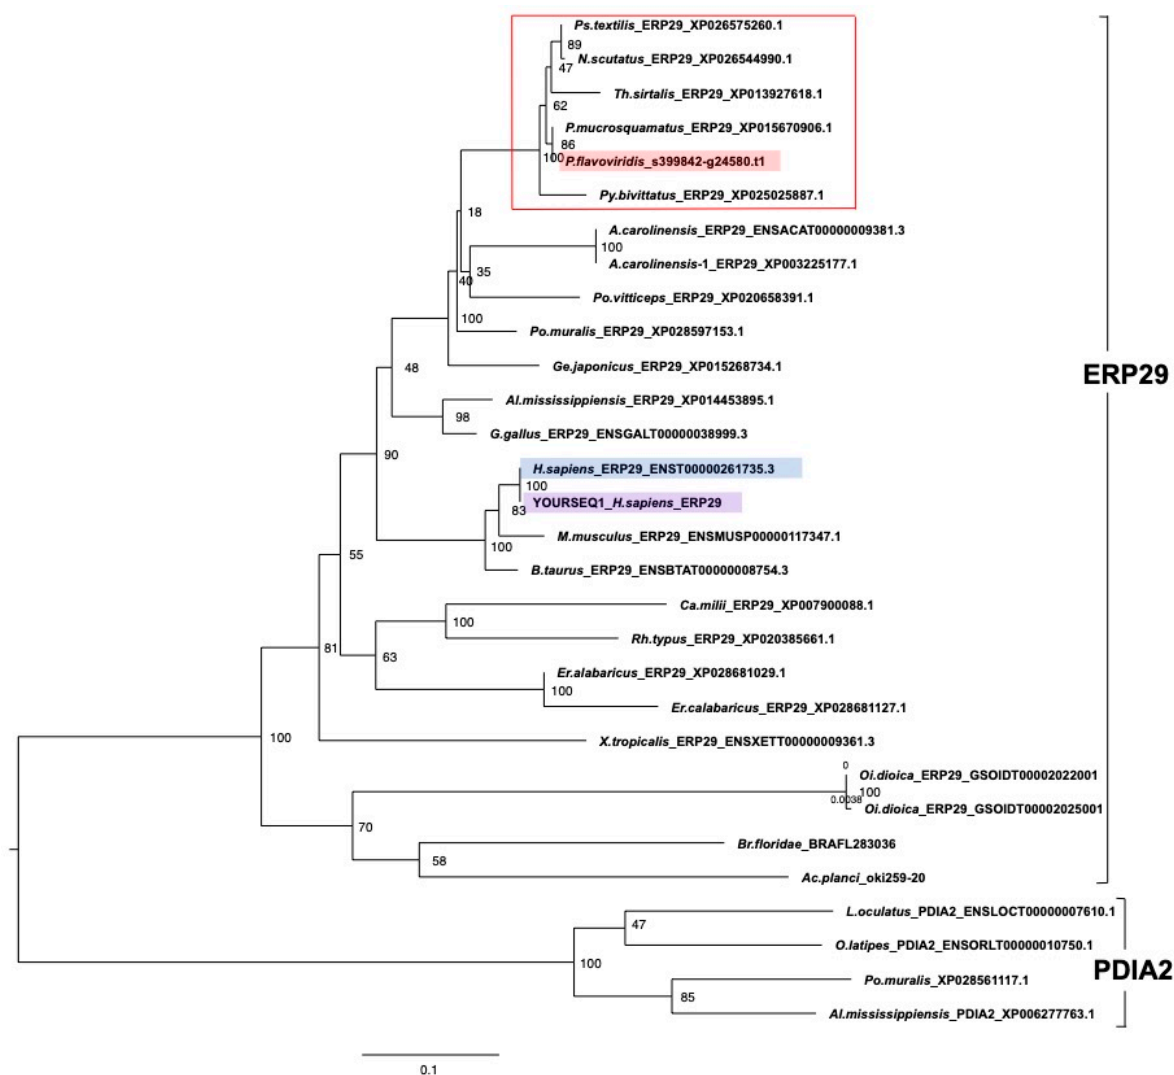

**Figure S4.** Molecular phylogenetic tree estimated using ORTHOSCOPE with human *ERP29* as the query sequence (highlighted in purple).

Sequences highlighted in blue indicate human orthologs. Those highlighted in pink represent *habu* (*P. flavoviridis*) orthologs, and those in red boxes represent other snake species. Values beside branches represent percentages of times that a node was supported in 100 bootstrap pseudoreplications implemented in ORTHOSCOPE. The scale bar indicates an evolutionary distance of 0.1 substitutions per position.



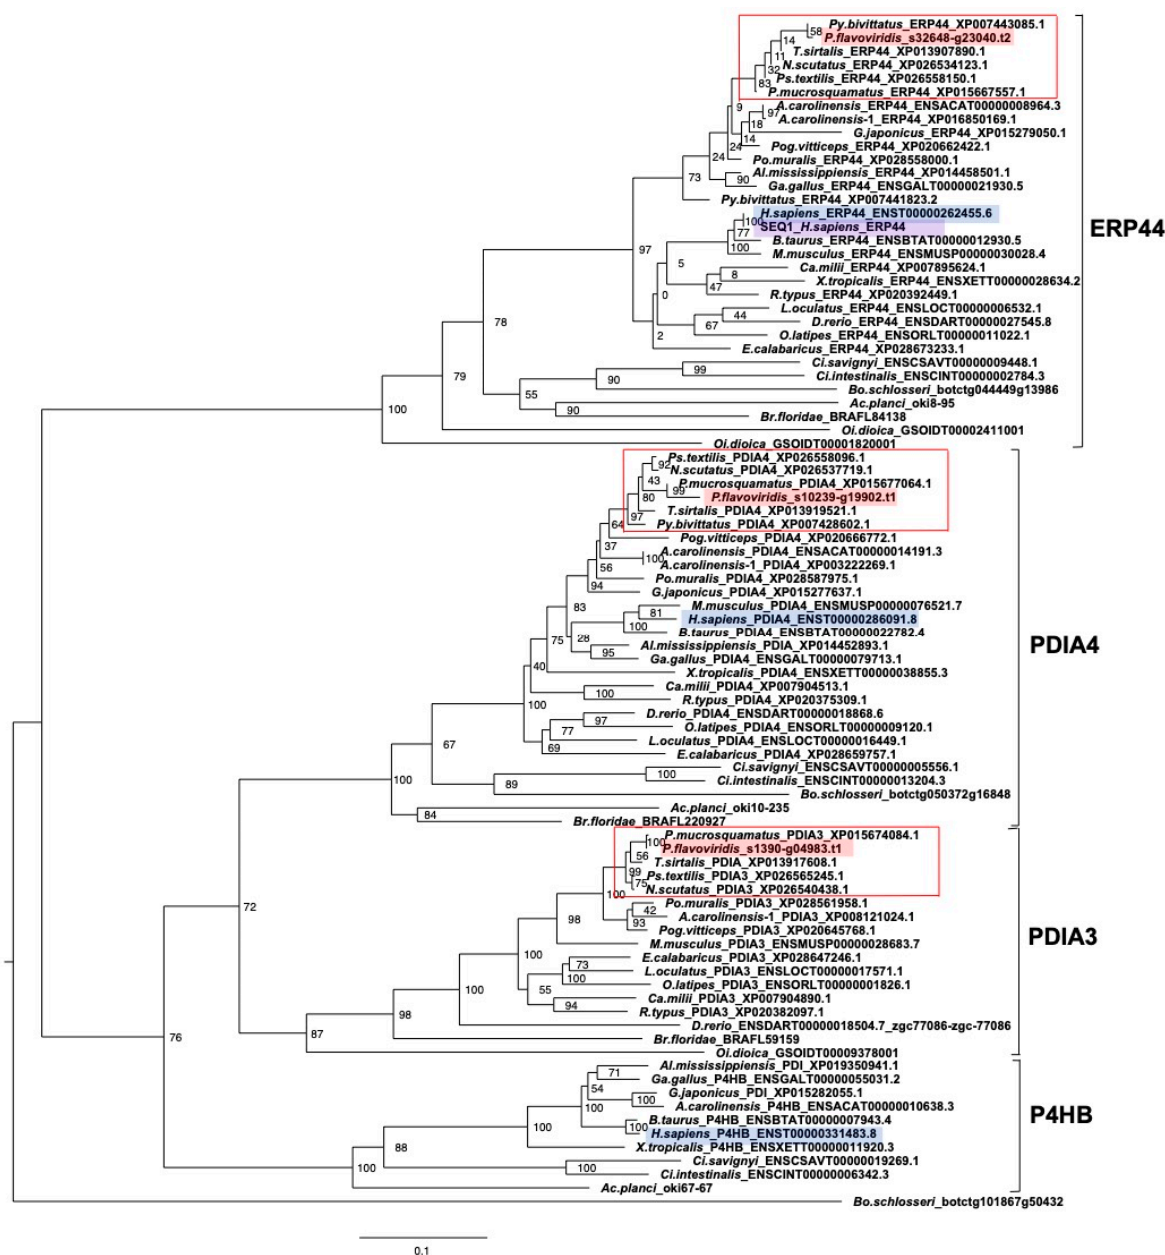

**Figure S5.** Molecular phylogenetic tree estimated using ORTHOSCOPE with human *ERP44* as the query sequence (highlighted in purple).

Sequences highlighted in blue indicate human orthologs. Those highlighted in pink represent habu (*P. flavoviridis*) orthologs, and those in red boxes represent other snake species. Values beside branches represent percentages of times that a node was supported in 100 bootstrap pseudoreplications implemented in ORTHOSCOPE. The scale bar indicates an evolutionary distance of 0.1 substitutions per position.

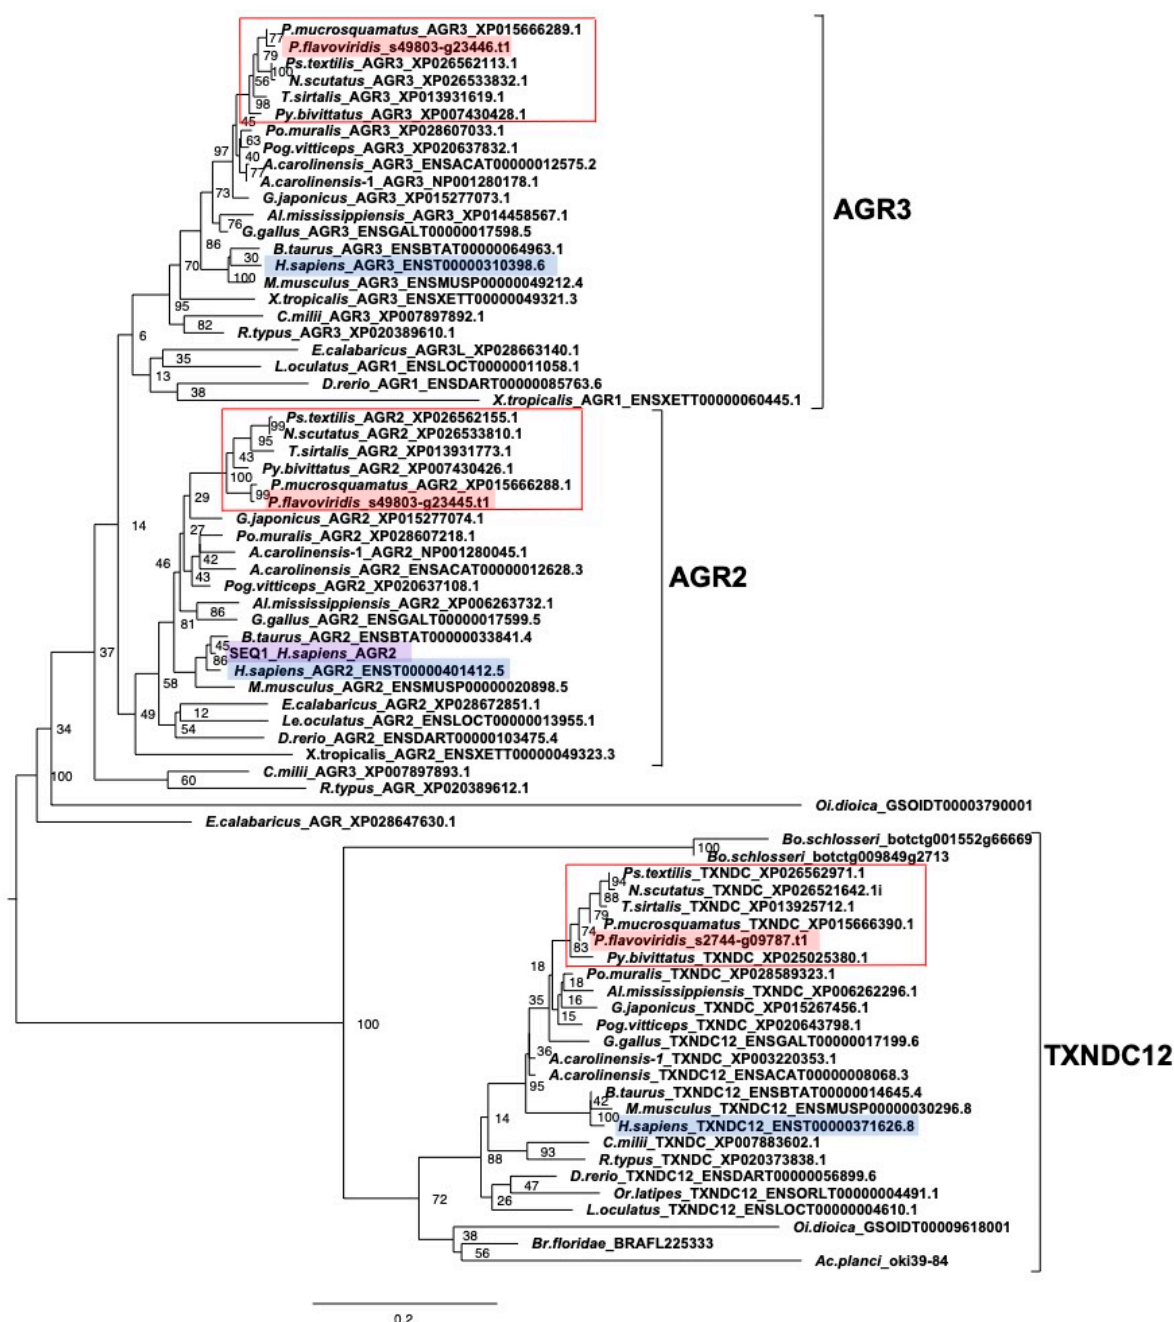

**Figure S6.** Molecular phylogenetic tree estimated using ORTHOSCOPE with human AGR2 as the query sequence (highlighted in purple).

Sequences highlighted in blue indicate human orthologs. Those highlighted in pink represent habu (*P. flavoviridis*) orthologs, and those in red boxes represent other snake species. Values beside branches represent percentages of times that a node was supported in 100 bootstrap pseudoreplications implemented in ORTHOSCOPE. The scale bar indicates an evolutionary distance of 0.2 substitutions per position.



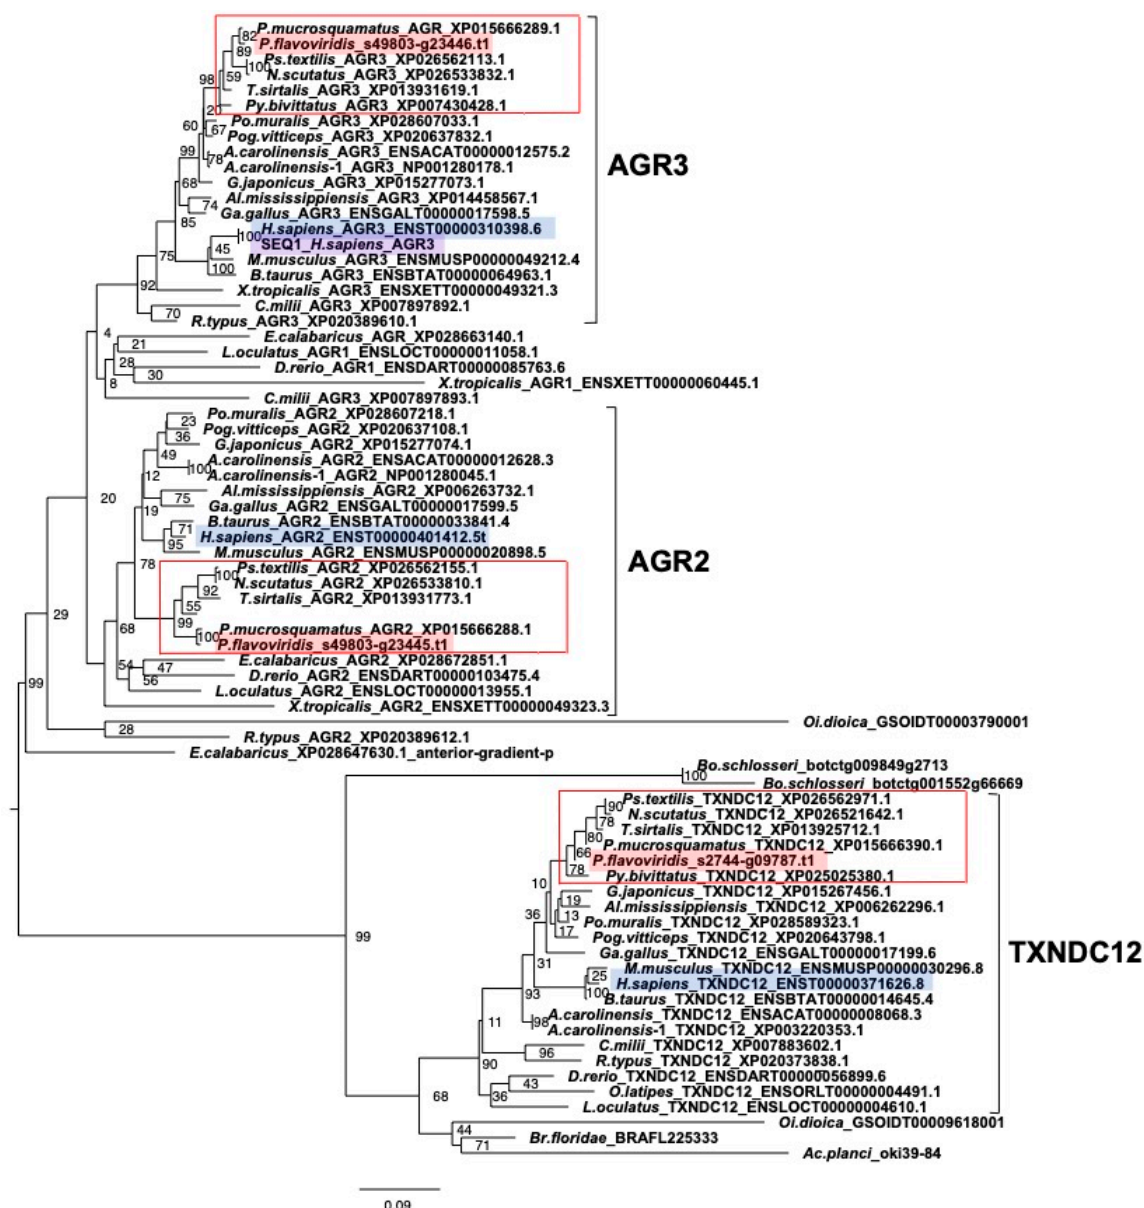

**Figure S7.** Molecular phylogenetic tree estimated using ORTHOSCOPE with human AGR3 as the query sequence (highlighted in purple).

Sequences highlighted in blue indicate human orthologs. Those highlighted in pink represent habu (*P. flavoviridis*) orthologs, and those in red boxes represent other snake species. Values beside branches represent percentages of times that a node was supported in 100 bootstrap pseudoreplications implemented in ORTHOSCOPE. The scale bar indicates an evolutionary distance of 0.09 substitutions per position.

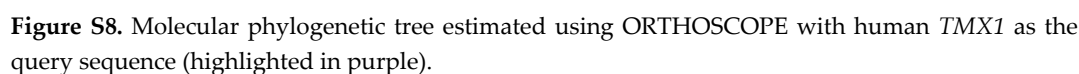

Sequences highlighted in blue indicate human orthologs. Those highlighted in pink represent habu (*P. flavoviridis*) orthologs, and those in red boxes represent other snake species. Values beside branches represent percentages of times that a node was supported in 100 bootstrap pseudoreplications implemented in ORTHOSCOPE. The scale bar indicates an evolutionary distance of 0.2 substitutions per position.

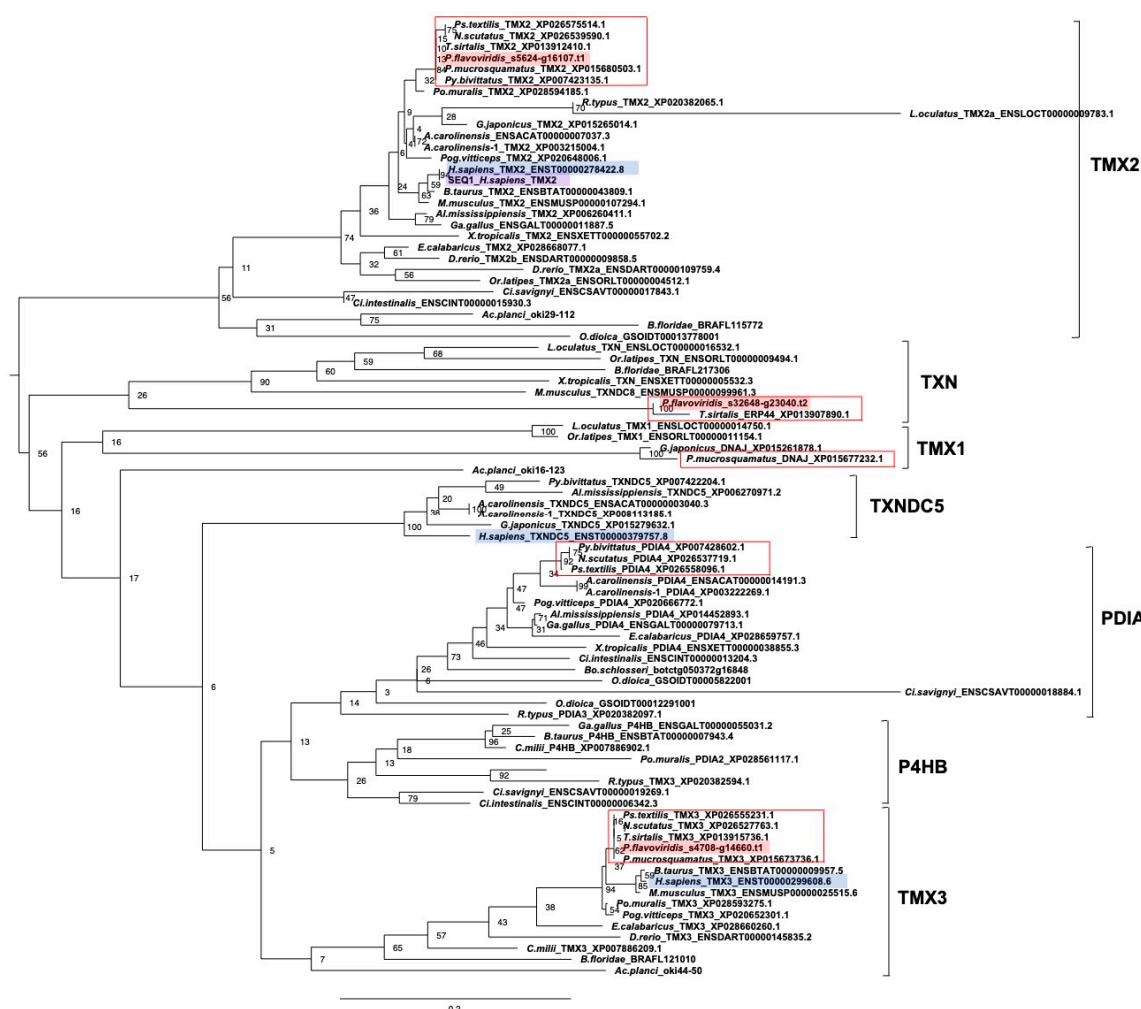

**Figure S9.** Molecular phylogenetic tree estimated using ORTHOSCOPE with human *TMX2* as the query sequence (highlighted in purple).

Sequences highlighted in blue indicate human orthologs. Those highlighted in pink represent habu (*P. flavoviridis*) orthologs, and those in red boxes represent other snake species. Values beside branches represent percentages of times that a node was supported in 100 bootstrap pseudoreplications implemented in ORTHOSCOPE. The scale bar indicates an evolutionary distance of 0.2 substitutions per position.

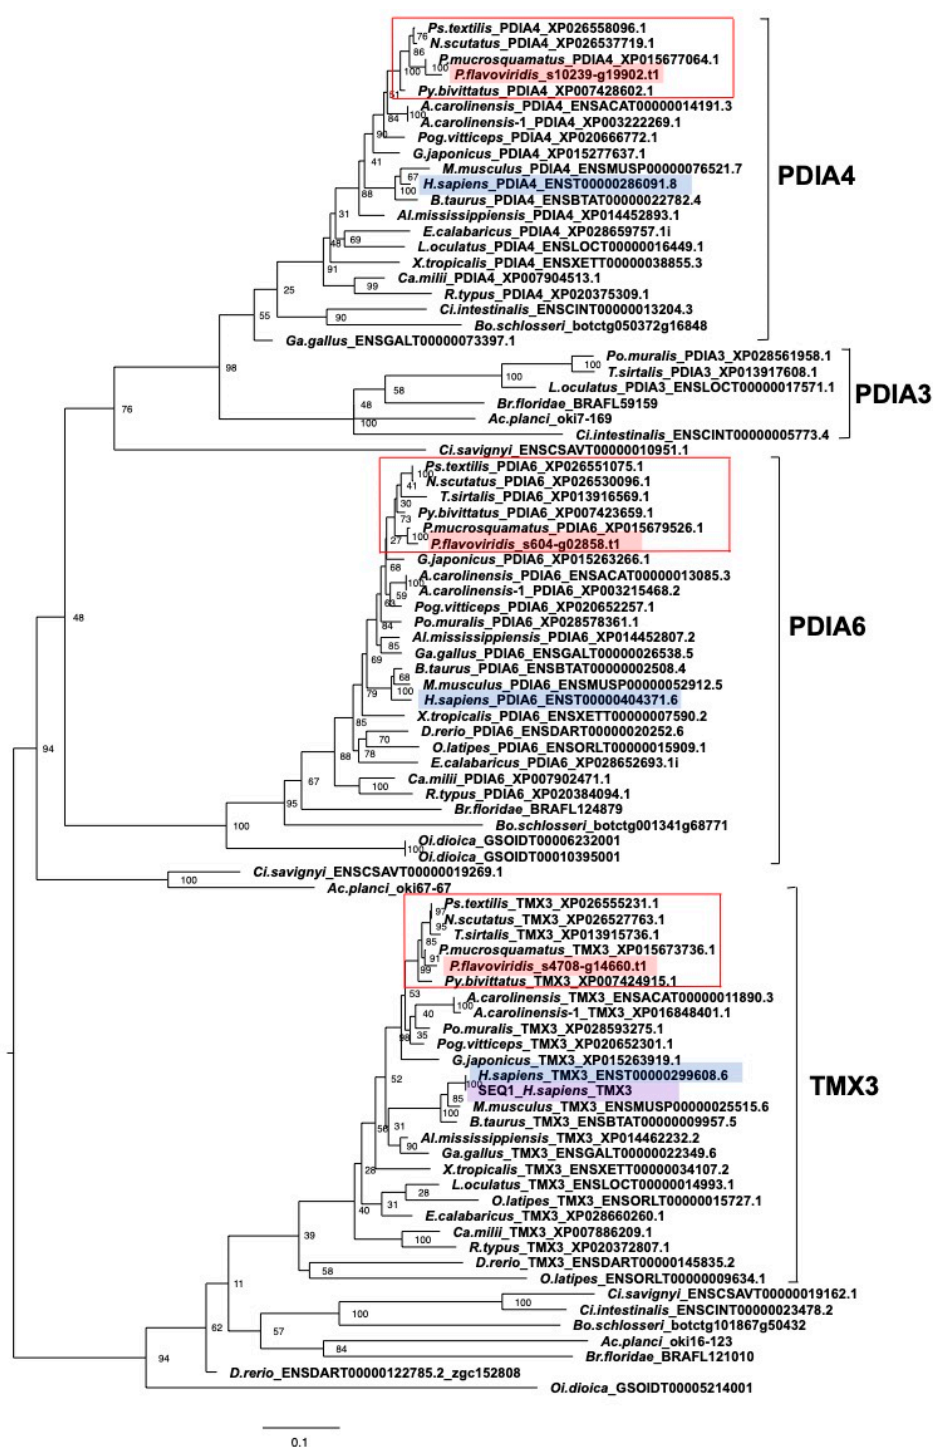

**Figure S10.** Molecular phylogenetic tree estimated using ORTHOSCOPE with human TMX3 as the query sequence (highlighted in purple).

Sequences highlighted in blue indicate human orthologs. Those highlighted in pink represent habu (*P. flavoviridis*) orthologs, and those in red boxes represent other snake species. Values beside branches represent percentages of times that a node was supported in 100 bootstrap pseudoreplications implemented in ORTHOSCOPE. The scale bar indicates an evolutionary distance of 0.1 substitutions per position.

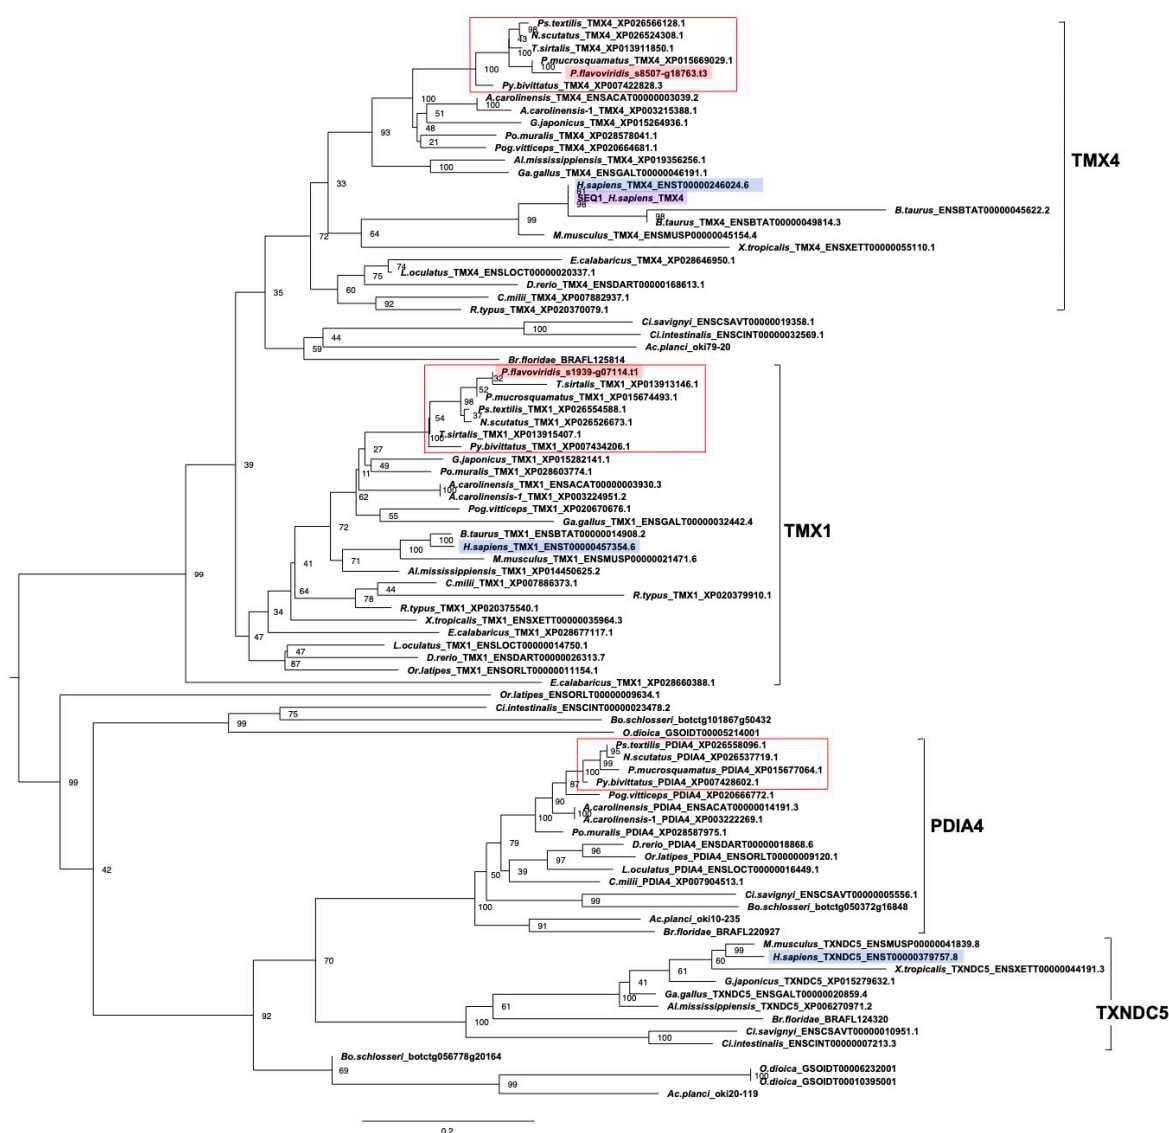

**Figure S11.** Molecular phylogenetic tree estimated using ORTHOSCOPE with human *TMX4* as the query sequence (highlighted in purple).

Sequences highlighted in blue indicate human orthologs. Those highlighted in pink represent habu (*P. flavoviridis*) orthologs, and those in red boxes represent other snake species. Values beside branches represent percentages of times that a node was supported in 100 bootstrap pseudoreplications implemented in ORTHOSCOPE. The scale bar indicates an evolutionary distance of 0.2 substitutions per position.



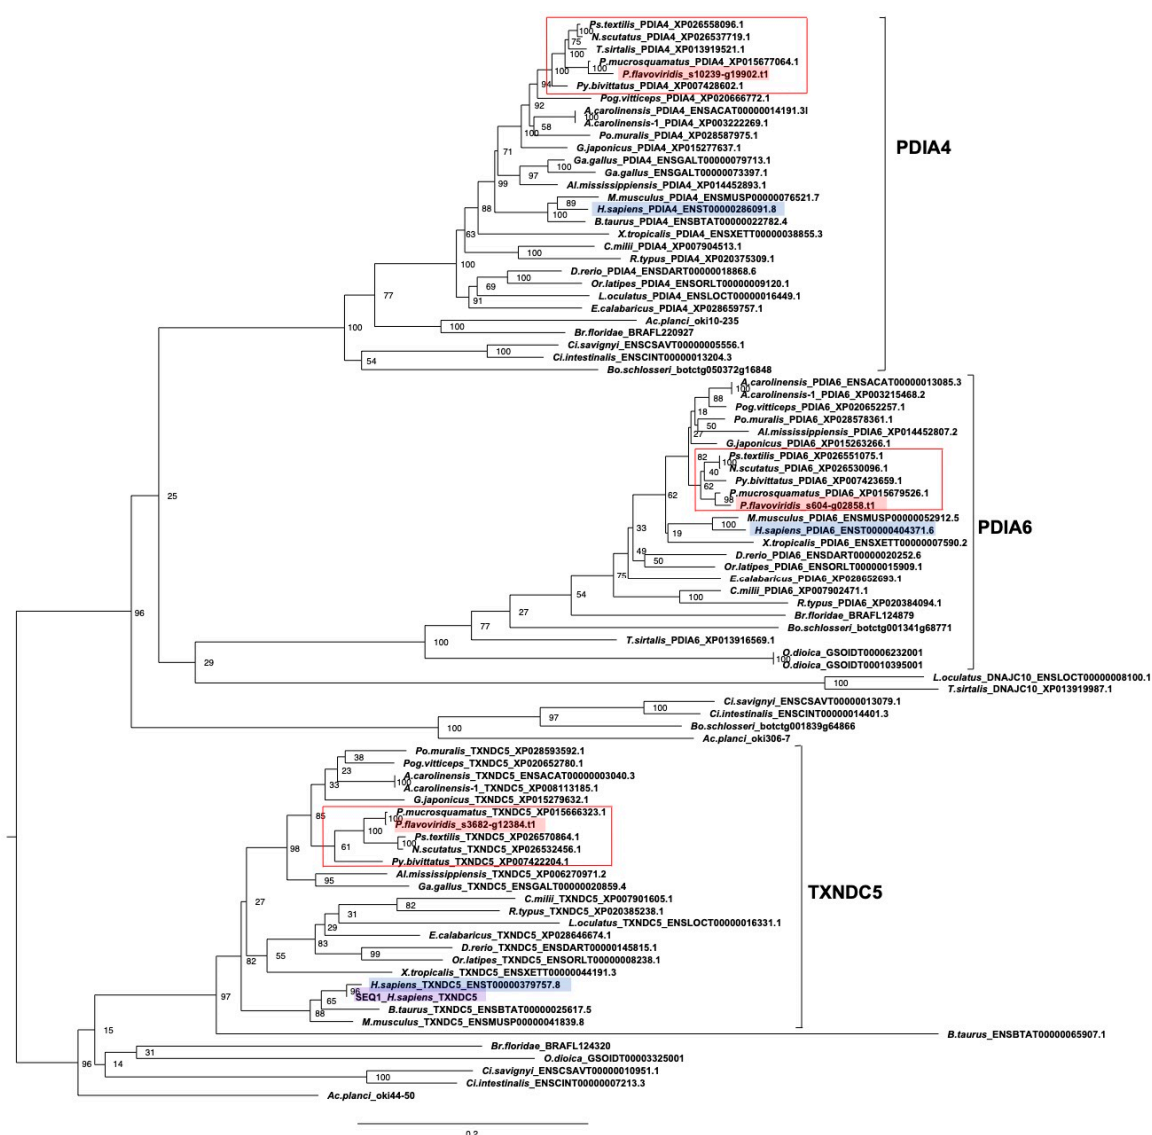

**Figure S12.** Molecular phylogenetic tree estimated using ORTHOSCOPE with human TXNDC5 as the query sequence (highlighted in purple).

Sequences highlighted in blue indicate human orthologs. Those highlighted in pink represent habu (*P. flavoviridis*) orthologs, and those in red boxes represent other snake species. Values beside branches represent percentages of times that a node was supported in 100 bootstrap pseudoreplications implemented in ORTHOSCOPE. The scale bar indicates an evolutionary distance of 0.2 substitutions per position.

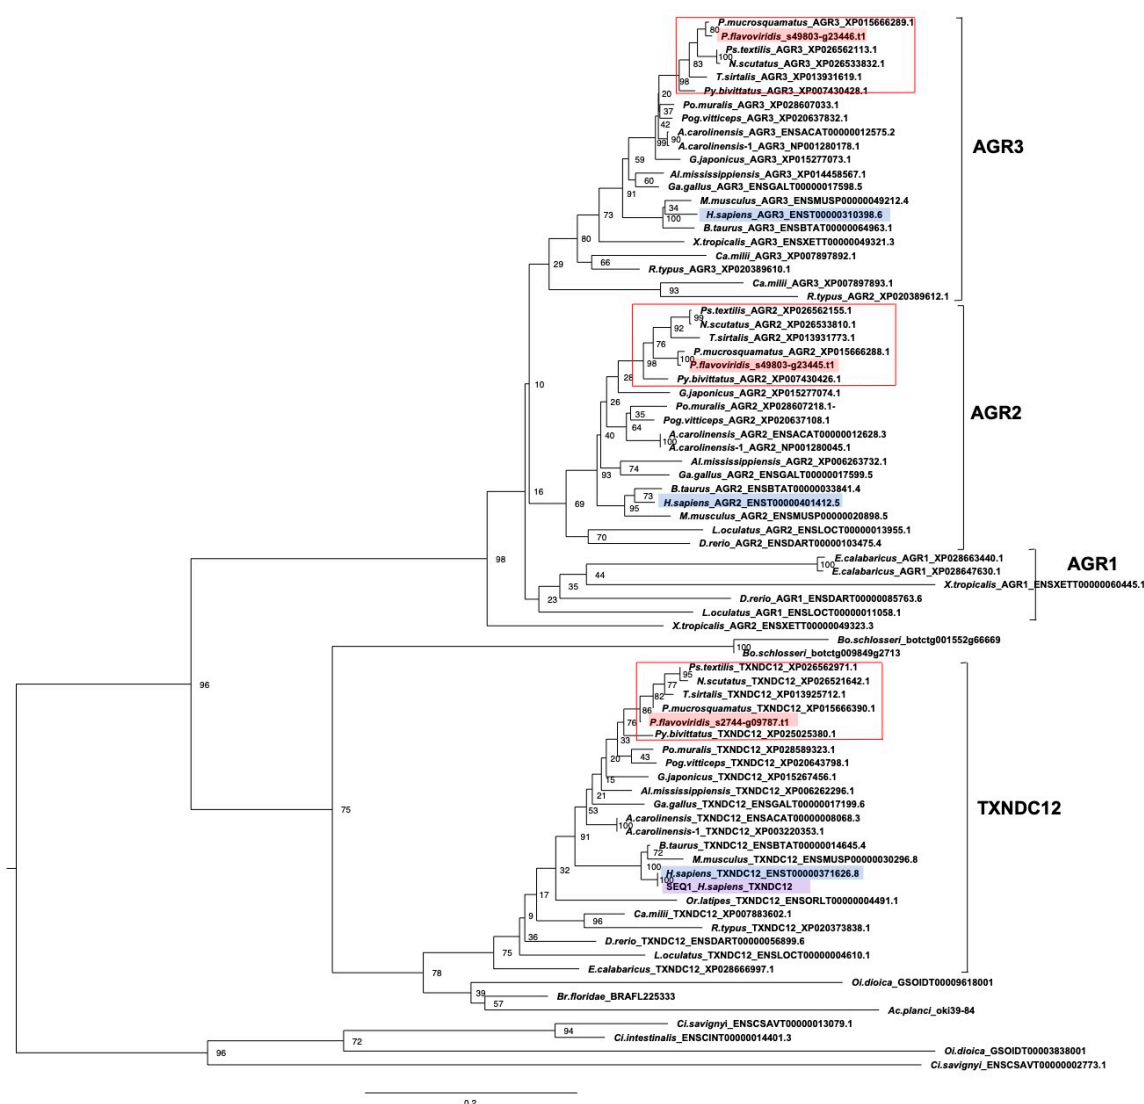

**Figure S13.** Molecular phylogenetic tree estimated using ORTHOSCOPE with human *TXNDC12* as the query sequence (highlighted in purple).

Sequences highlighted in blue indicate human orthologs. Those highlighted in pink represent *habu* (*P. flavoviridis*) orthologs, and those in red boxes represent other snake species. Values beside branches represent percentages of times that a node was supported in 100 bootstrap pseudoreplications implemented in ORTHOSCOPE. The scale bar indicates an evolutionary distance of 0.2 substitutions per position.

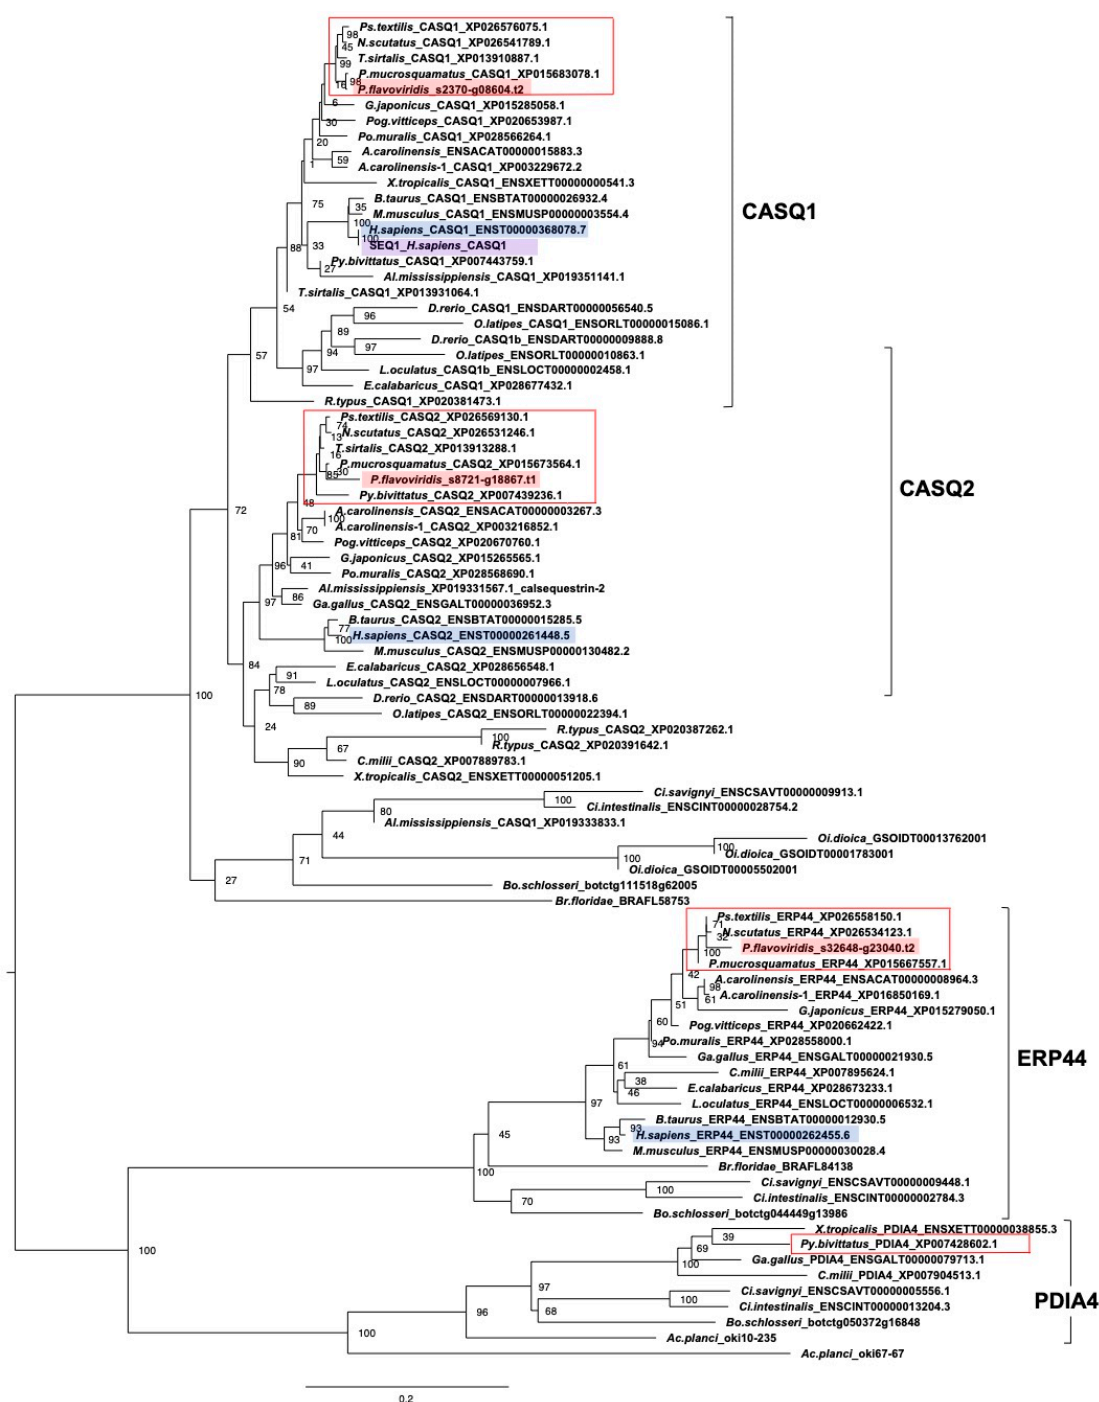

**Figure S14.** Molecular phylogenetic tree estimated using ORTHOSCOPE with human CASQ1 as the query sequence (highlighted in purple).

Sequences highlighted in blue indicate human orthologs. Those highlighted in pink represent habu (*P. flavoviridis*) orthologs, and those in red boxes represent other snake species. Values beside branches represent percentages of times that a node was supported in 100 bootstrap pseudoreplications implemented in ORTHOSCOPE. The scale bar indicates an evolutionary distance of 0.2 substitutions per position.

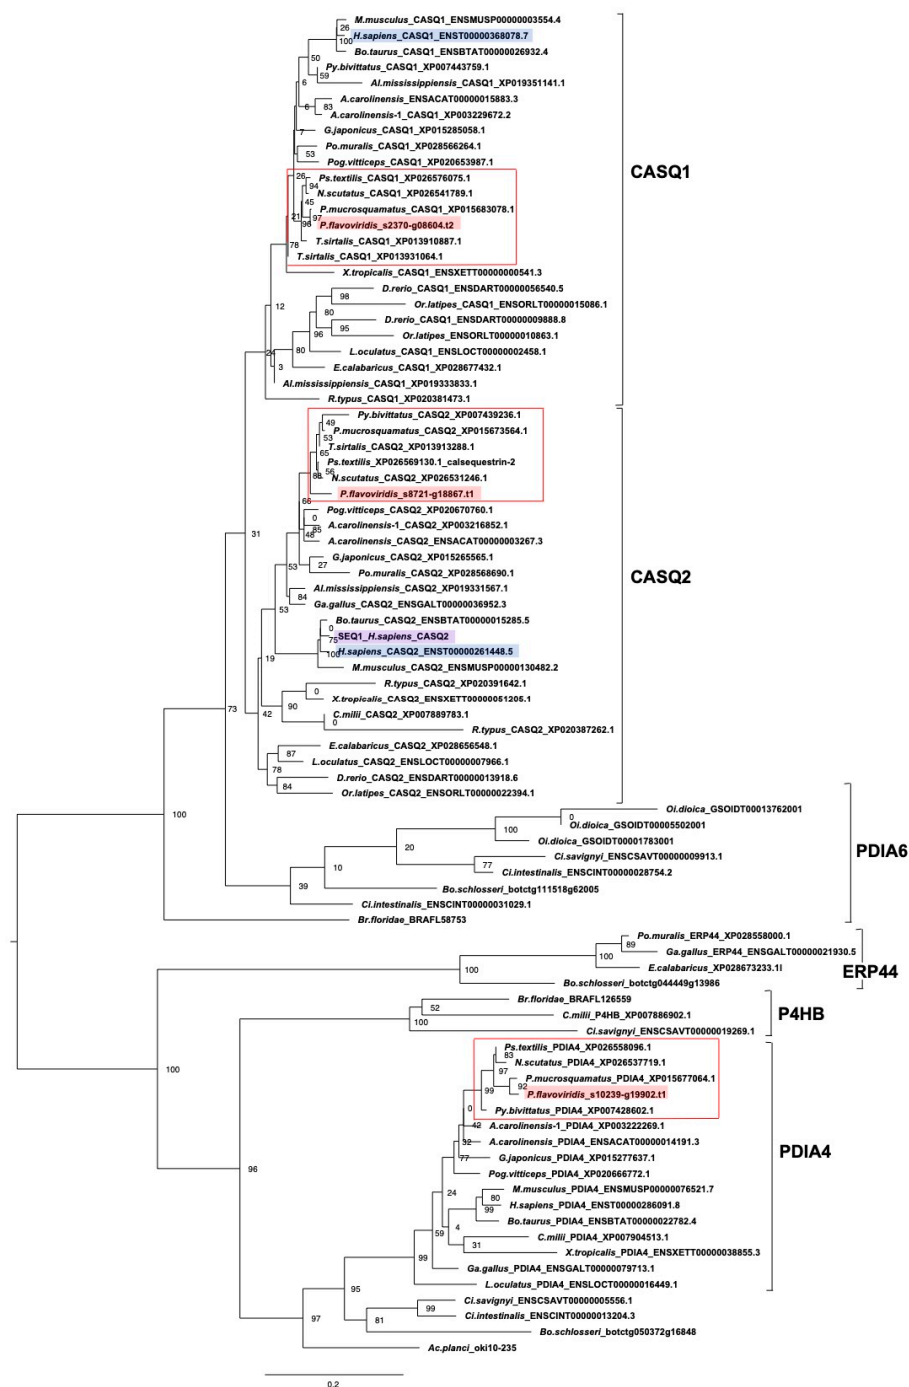

**Figure S15.** Molecular phylogenetic tree estimated using ORTHOSCOPE with human CASQ2 as the query sequence (highlighted in purple).

Sequences highlighted in blue indicate human orthologs. Those highlighted in pink represent habu (*P. flavoviridis*) orthologs, and those in red boxes represent other snake species. Values beside branches represent percentages of times that a node was supported in 100 bootstrap pseudoreplications implemented in ORTHOSCOPE. The scale bar indicates an evolutionary distance of 0.2 substitutions per position.

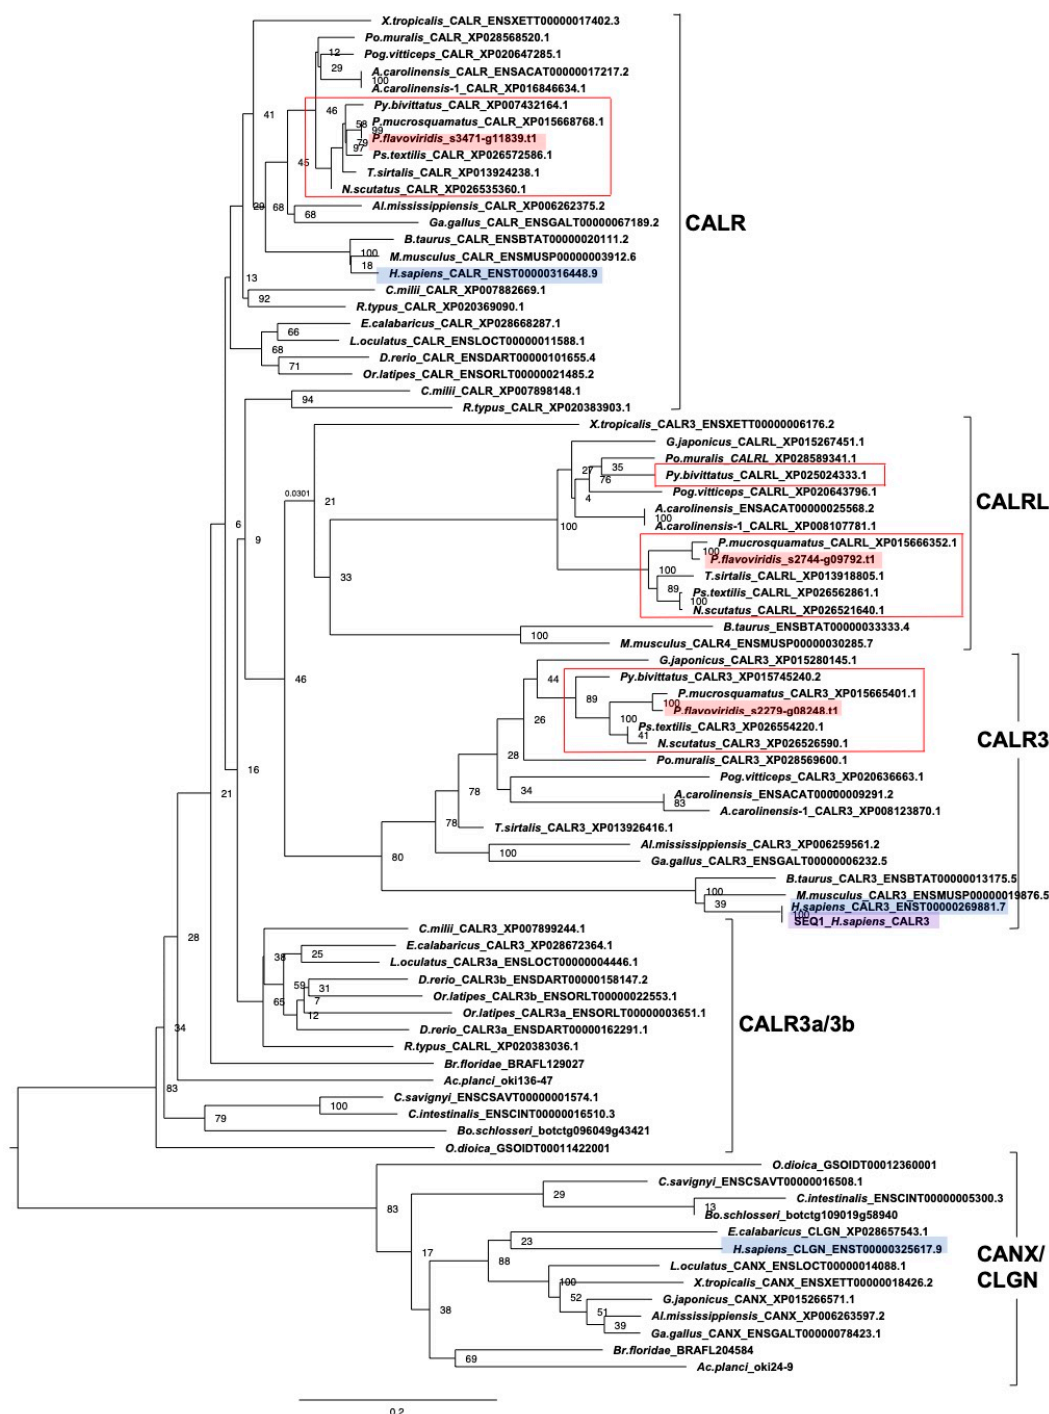

**Figure S16.** Molecular phylogenetic tree estimated using ORTHOSCOPE with human CALR3 as the query sequence (highlighted in purple).

Sequences highlighted in blue indicate human orthologs. Those highlighted in pink represent habu (*P. flavoviridis*) orthologs, and those in red boxes represent other snake species. Values beside branches represent percentages of times that a node was supported in 100 bootstrap pseudoreplications implemented in ORTHOSCOPE. The scale bar indicates an evolutionary distance of 0.2 substitutions per position.



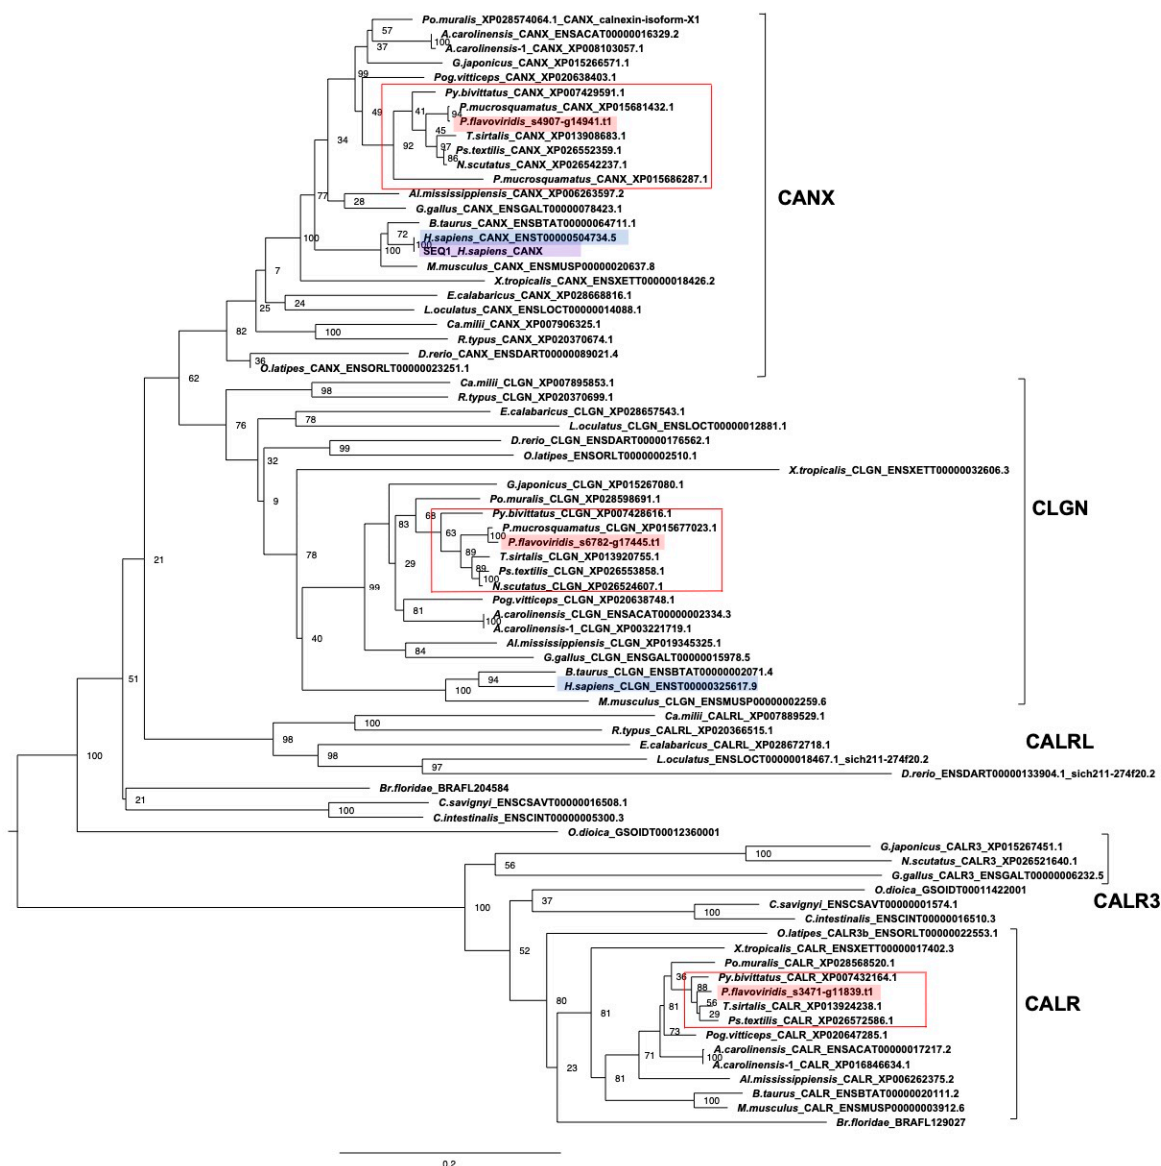

**Figure S17.** Molecular phylogenetic tree estimated using ORTHOSCOPE with human CANX as the query sequence (highlighted in purple).

Sequences highlighted in blue indicate human orthologs. Those highlighted in pink represent habu (*P. flavoviridis*) orthologs, and those in red boxes represent other snake species. Values beside branches represent percentages of times that a node was supported in 100 bootstrap pseudoreplications implemented in ORTHOSCOPE. The scale bar indicates an evolutionary distance of 0.2 substitutions per position.

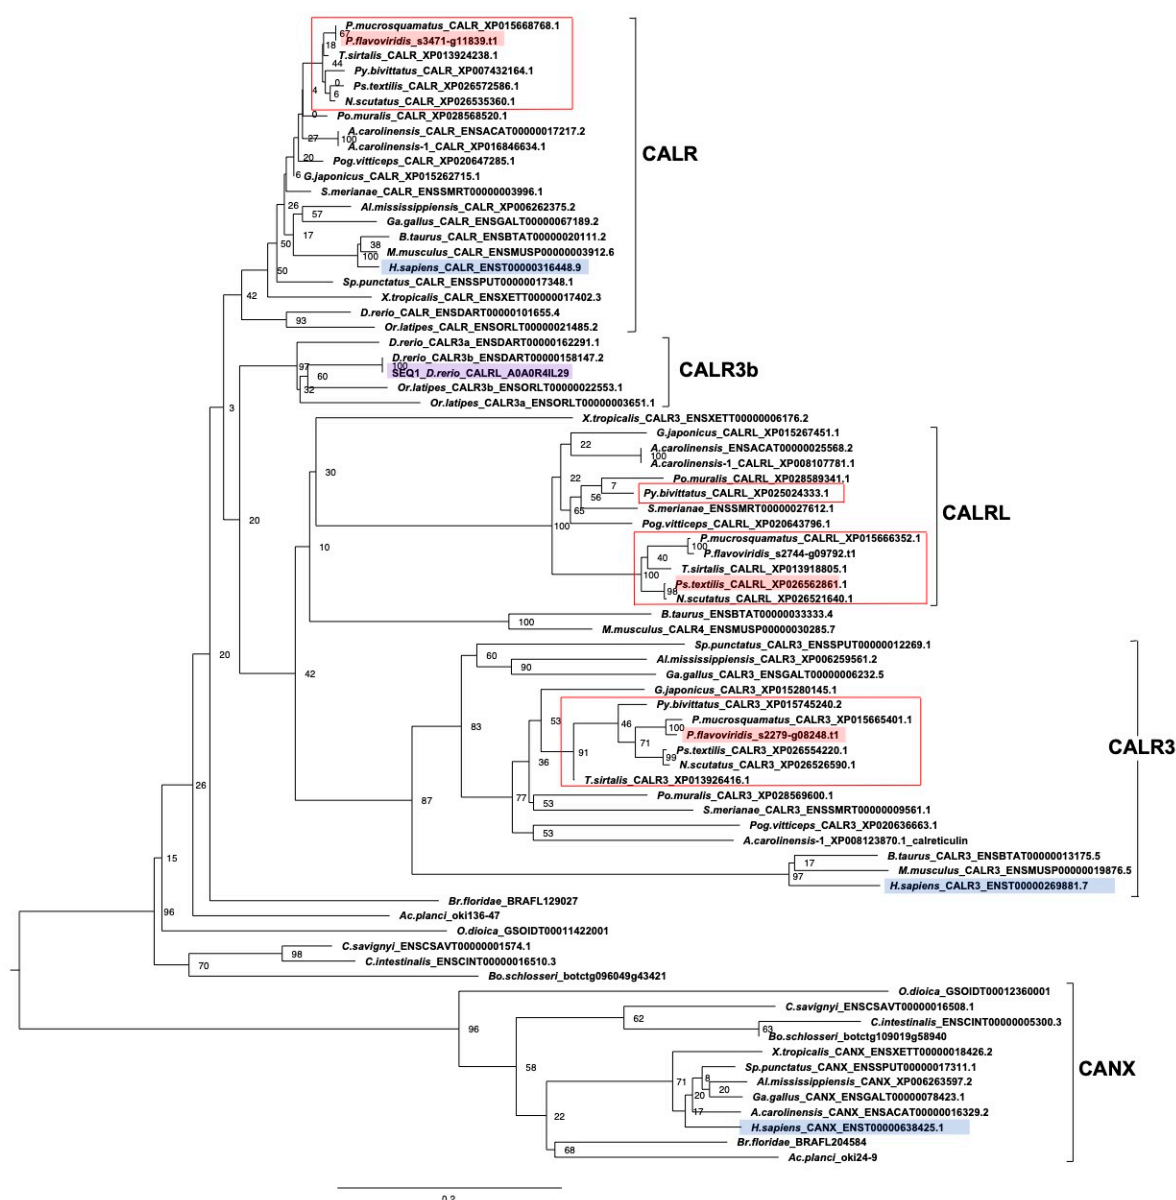

**Figure S18.** Molecular phylogenetic tree estimated using ORTHOSCOPE with *Danio rerio* CALRL as the query sequence (highlighted in purple).

Sequences highlighted in blue indicate human orthologs. Those highlighted in pink represent habu (*P. flavoviridis*) orthologs, and those in red boxes represent other snake species. Values beside branches represent percentages of times that a node was supported in 100 bootstrap pseudoreplications implemented in ORTHOSCOPE. The scale bar indicates an evolutionary distance of 0.2 substitutions per position.

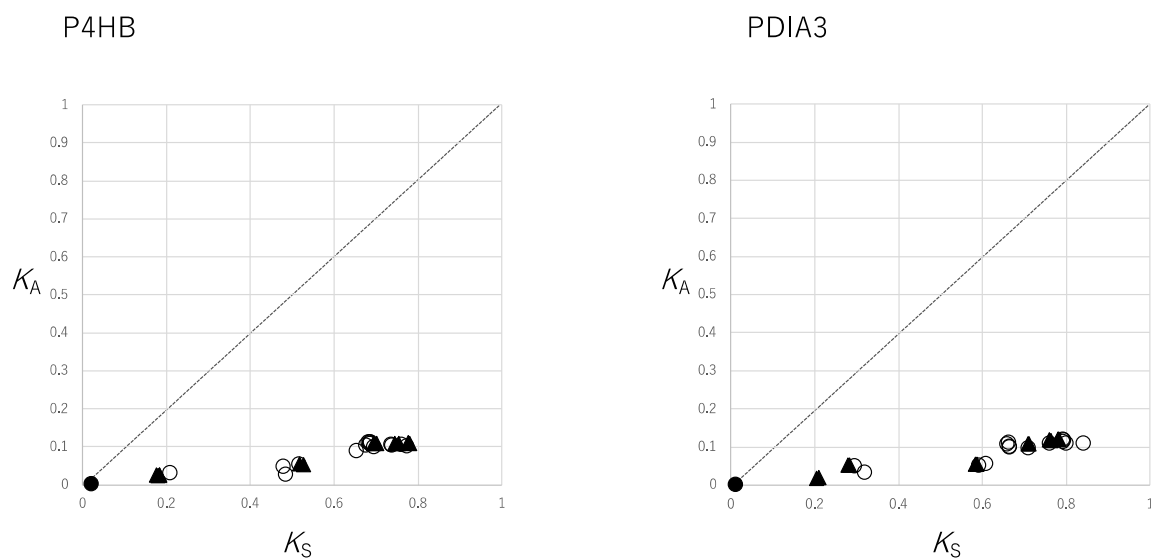

**Figure S19.**  $K_A/K_S$  plot for major venom protein modification candidate enzyme or chaperone genes, *P4HB* (left) and *PDIA3* (right).

$K_A$  and  $K_S$  values were calculated by the Nei-Gojobori method for each pairwise genes: venomous snake vs venomous snake (●), venomous snake vs other animal (including human) (▲), and other animal vs other animal (○). Venomous snakes include *Protobothrops flavoviridis* and *P. mucrosquamatus*, and other animals include human, mouse, chicken, anole and non-venomous snakes (*Python bivittatus* and *Thamnophis sirtalis*).

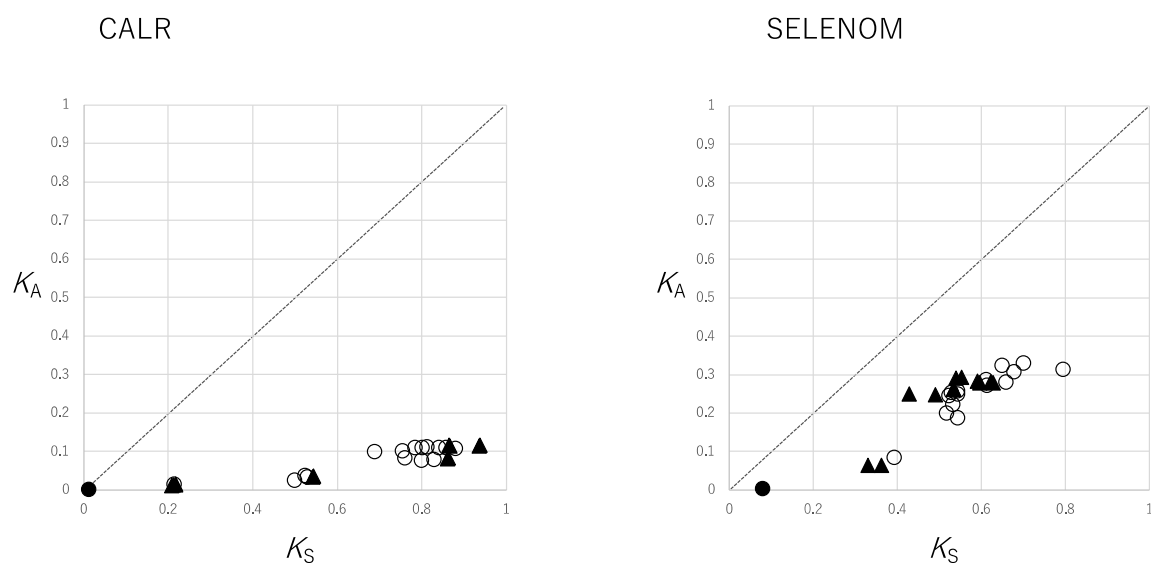

**Figure S20.**  $K_A/K_S$  plot for major venom protein modification candidate enzyme or chaperone genes, CALR (left) and SELENOM (right).

$K_A$  and  $K_S$  values were calculated by the Nei-Gojobori method for each pairwise genes: venomous snake vs venomous snake (●), venomous snake vs other animals (including human) (▲), and other animals vs other animals (○). Venomous snakes include *Protobothrops flavoviridis* and *P. mucrosquamatus*, and other animals include human, mouse, chicken, anole and non-venomous snakes (*Python bivittatus* and *Thamnophis sirtalis*).
